# Supplementary material for: Oxidative Stress and Endoplasmic Reticulum Stress Contributes to Arecoline and Its Secondary Metabolites-Induced Dyskinesia in Zebrafish Embryos
Source: MDPI journal article supplement (doi:10.3390/ijms24076327), 2023-03-28
Supplement: s1 [file s1]

Supplementary materials:

## **Oxidative Stress and Endoplasmic Reticulum Stress Contributes to Arecoline and Its Secondary Metabolites-induced Dyskinesia in Zebrafish Embryo**

Wenhua Yan<sup>1†</sup>, Tian Zhang<sup>2†</sup>, Shuaiting Li<sup>1†</sup>, Yunpeng Wang<sup>1</sup>, Li Zhu<sup>2</sup>, Yu Cao<sup>2</sup>, Xiaofang Lai<sup>3</sup>, Huizhe Huang<sup>1\*</sup>

1. The Second Affiliated Hospital of Chongqing Medical University, No.76 Linjiang Road, Yuzhong District, Chongqing, 400010, People's Republic of China.

2. Key Laboratory of Bio-Rheological Science and Technology, State and Local Joint Engineering Laboratory for Vascular Implants, Bioengineering College of Chongqing, University, No.174 Shazhengjie, Shapingba, Chongqing, 400044, People's Republic of China.

3. College of Marine Science and Fisheries, Key Laboratory of Marine Biological Resources and Environment of Jiangsu Province, Jiangsu Ocean University, Lianyungang, 222005, People's Republic of China.

\* Correspondence: Huizhe Huang, E-mail: 102582@cqmu.edu.cn, Tel.: +86-023-62888334.

† These authors contributed equally to this work.

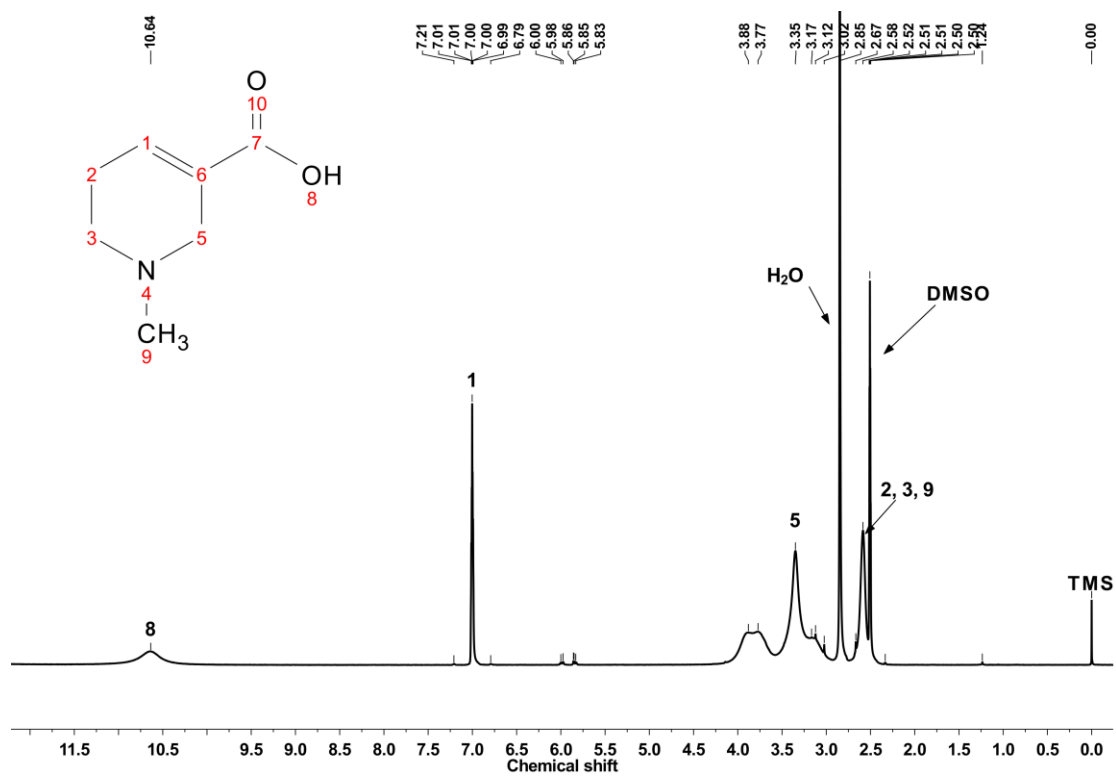

Figure S1. Nuclear magnetic resonance hydrogen spectrum ( $^1\text{H}$ -NMR) of arecoline (MHz, DMSO- $\text{d}_6$ ).

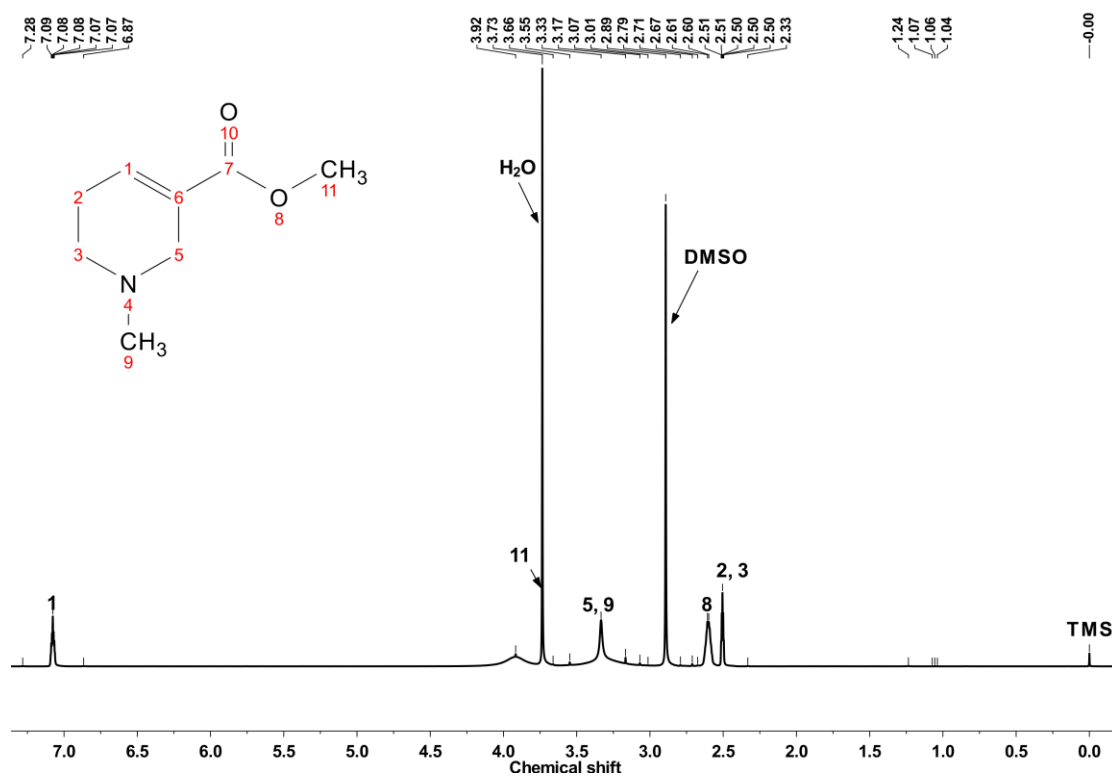

Figure S2. <sup>1</sup>H-NMR of arecaidine (MHz, DMSO-d<sub>6</sub>).

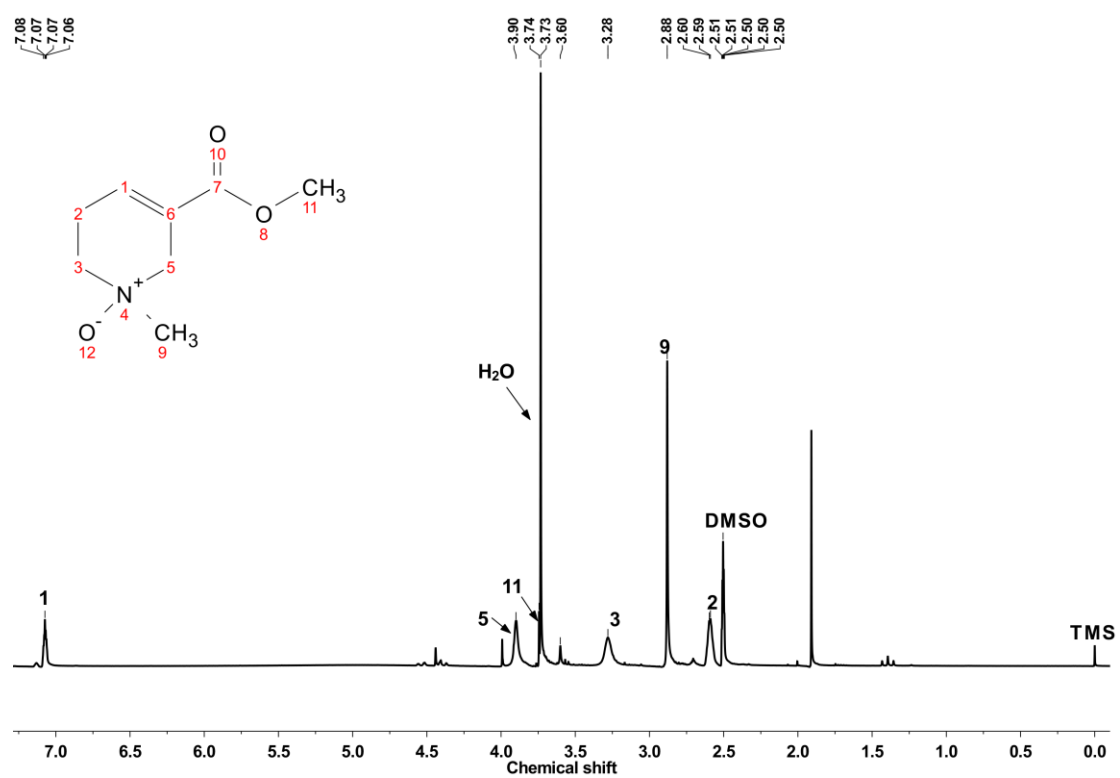

**Figure S3.**  $^1\text{H}$ -NMR of arecoline *N*-oxide (MHz,  $\text{DMSO}-d_6$ ).

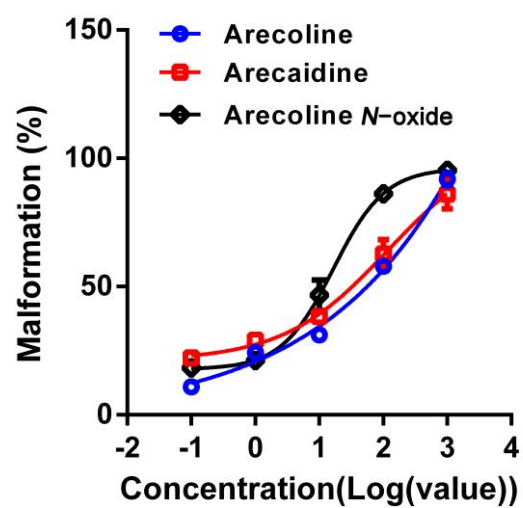

**Figure S4.** Half maximal teratogenesis concentration of zebrafish embryos at 96 hpf.



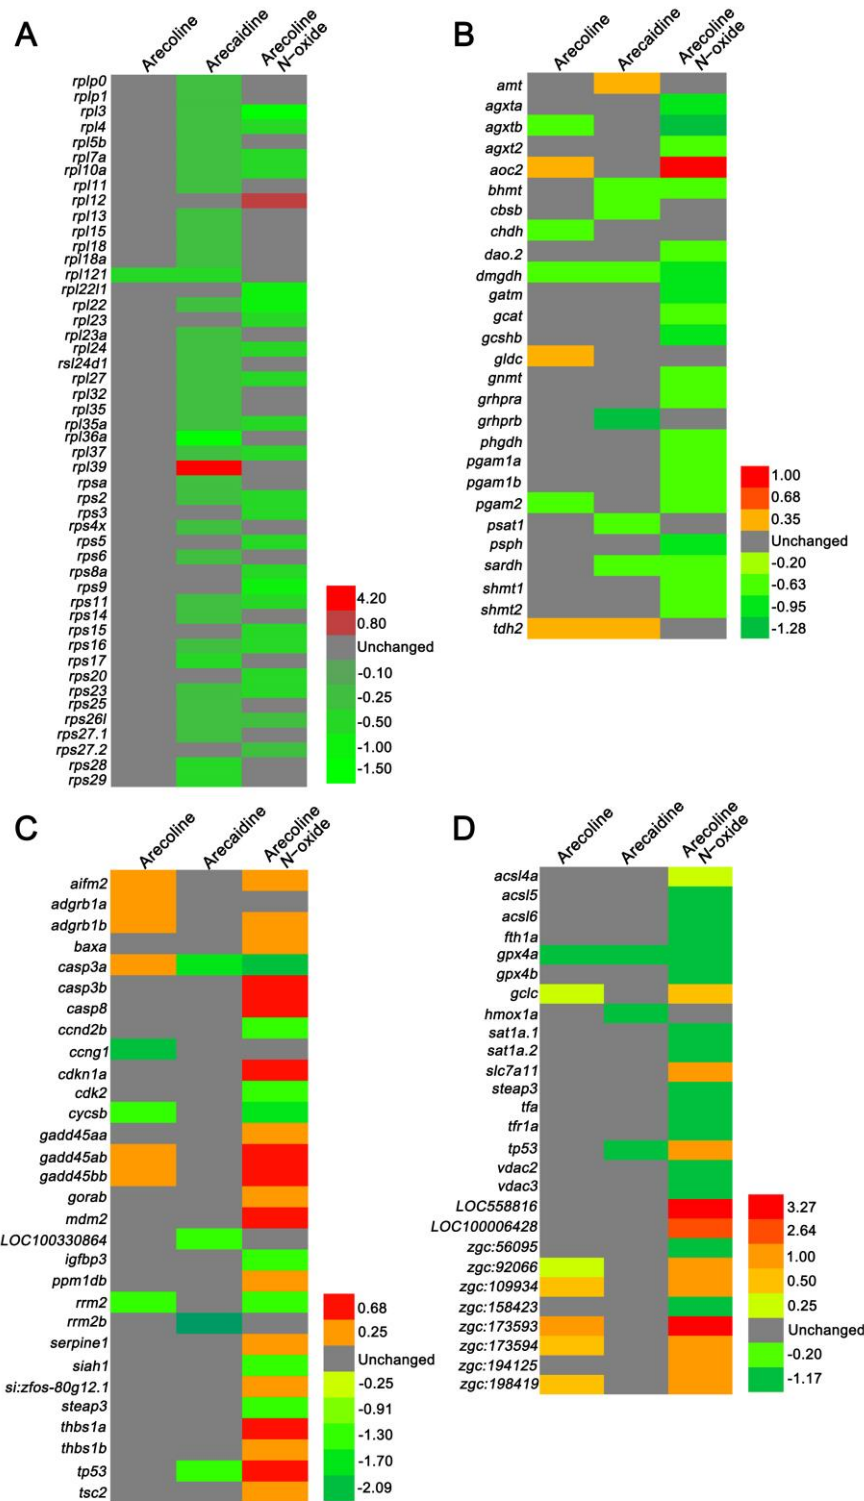

**Figure S6.** DEGs in the ribosome (A), glycine, serine and threonine metabolism (B), p53 signaling (C), and ferroptosis (D) pathways in zebrafish larvae after exposure to Areca-related toxins at 96 hpf.

**Table S1.** Hatchability of zebrafish larvae after exposure to areca alkaloids at 96 hpf

| Arecoline                 | Mean(%) | SD   | P value     | Arecaidine  | Mean(%) | SD   | P value     |
|---------------------------|---------|------|-------------|-------------|---------|------|-------------|
| Control                   | 95.43   | 1.51 |             | Control     | 95.51   | 1.64 |             |
| 100 nM                    | 91.60   | 1.39 | 0.0617 (ns) | 100 nM      | 94.91   | 2.43 | 0.9940 (ns) |
| 1 $\mu$ M                 | 93.91   | 1.56 | 0.7654 (ns) | 1 $\mu$ M   | 92.30   | 1.20 | 0.1483 (ns) |
| 10 $\mu$ M                | 94.64   | 0.08 | 0.9782 (ns) | 10 $\mu$ M  | 93.05   | 1.46 | 0.3570 (ns) |
| 100 $\mu$ M               | 95.61   | 1.53 | 0.9998 (ns) | 100 $\mu$ M | 93.22   | 1.43 | 0.4260 (ns) |
| 1 mM                      | 91.92   | 2.57 | 0.0964 (ns) | 1 mM        | 92.12   | 2.50 | 0.1166 (ns) |
| Arecoline <i>N</i> -oxide | Mean(%) | SD   | P value     |             |         |      |             |
| Control                   | 95.36   | 1.49 |             |             |         |      |             |
| 100 nM                    | 96.16   | 1.63 | 0.9770 (ns) |             |         |      |             |
| 1 $\mu$ M                 | 94.26   | 2.82 | 0.9190 (ns) |             |         |      |             |
| 10 $\mu$ M                | 94.29   | 2.86 | 0.9264 (ns) |             |         |      |             |
| 100 $\mu$ M               | 93.48   | 1.79 | 0.6062 (ns) |             |         |      |             |
| 1 mM                      | 95.29   | 1.61 | 0.9999 (ns) |             |         |      |             |



**Table S2.** Mortality of zebrafish larvae after exposure to areca alkaloids at 96 hpf

| Arecoline                 | Mean(%) | SD   | P value     | Arecaidine  | Mean(%) | SD   | P value     |
|---------------------------|---------|------|-------------|-------------|---------|------|-------------|
| Control                   | 0.95    | 1.65 |             | Control     | 3.33    | 1.44 |             |
| 100 nM                    | 0.83    | 1.44 | 0.9999 (ns) | 100 nM      | 2.50    | 2.50 | 0.9789 (ns) |
| 1 $\mu$ M                 | 4.17    | 1.44 | 0.1857 (ns) | 1 $\mu$ M   | 2.50    | 2.50 | 0.9789 (ns) |
| 10 $\mu$ M                | 5.12    | 2.32 | 0.0535 (ns) | 10 $\mu$ M  | 4.17    | 1.44 | 0.9789 (ns) |
| 100 $\mu$ M               | 5.00    | 2.50 | 0.0633 (ns) | 100 $\mu$ M | 1.67    | 1.44 | 0.7473 (ns) |
| 1 mM                      | 4.52    | 1.49 | 0.1198 (ns) | 1 mM        | 5.00    | 2.50 | 0.7473 (ns) |
| Arecoline <i>N</i> -oxide | Mean(%) | SD   | P value     |             |         |      |             |
| Control                   | 2.62    | 2.51 |             |             |         |      |             |
| 100 nM                    | 0.95    | 1.65 | 0.7473 (ns) |             |         |      |             |
| 1 $\mu$ M                 | 0.95    | 1.65 | 0.7473 (ns) |             |         |      |             |
| 10 $\mu$ M                | 1.91    | 1.65 | 0.9893 (ns) |             |         |      |             |
| 100 $\mu$ M               | 2.62    | 2.51 | 0.9999 (ns) |             |         |      |             |
| 1 mM                      | 1.91    | 1.65 | 0.9893 (ns) |             |         |      |             |

**Table S3.** Malformation of zebrafish larvae after exposure to areca alkaloids at 96 hpf

| Arecoline                 | Mean(%) | SD   | P value       | Arecaidine  | Mean(%) | SD   | P value       |
|---------------------------|---------|------|---------------|-------------|---------|------|---------------|
| Control                   | 2.76    | 0.17 |               | Control     | 2.68    | 0.16 |               |
| 100 nM                    | 10.92   | 1.38 | 0.0034 (**)   | 100 nM      | 18.26   | 1.53 | < 0.001 (***) |
| 1 $\mu$ M                 | 24.36   | 1.72 | < 0.001 (***) | 1 $\mu$ M   | 21.15   | 1.51 | < 0.001 (***) |
| 10 $\mu$ M                | 31.25   | 1.38 | < 0.001 (***) | 10 $\mu$ M  | 46.67   | 5.95 | < 0.001 (***) |
| 100 $\mu$ M               | 57.88   | 1.11 | < 0.001 (***) | 100 $\mu$ M | 86.17   | 2.22 | < 0.001 (***) |
| 1 mM                      | 91.91   | 2.57 | < 0.001 (***) | 1 mM        | 95.29   | 1.61 | < 0.001 (***) |
| Arecoline <i>N</i> -oxide | Mean(%) | SD   | P value       |             |         |      |               |
| Control                   | 2.81    | 0.16 |               |             |         |      |               |
| 100 nM                    | 18.26   | 1.53 | < 0.001 (***) |             |         |      |               |
| 1 $\mu$ M                 | 21.15   | 1.51 | < 0.001 (***) |             |         |      |               |
| 10 $\mu$ M                | 46.67   | 5.95 | < 0.001 (***) |             |         |      |               |
| 100 $\mu$ M               | 86.17   | 2.22 | < 0.001 (***) |             |         |      |               |
| 1 mM                      | 95.29   | 1.61 | < 0.001 (***) |             |         |      |               |

**Table S4.** Body length of the zebrafish larvae after exposure to areca alkaloids at 96 hpf

| Arecoline                 | Mean( $\mu$ m) | SD     | P value      | Arecaidine  | Mean( $\mu$ m) | SD     | P value      |
|---------------------------|----------------|--------|--------------|-------------|----------------|--------|--------------|
| Control                   | 3891.04        | 93.56  |              | Control     | 3817.13        | 113.56 |              |
| 100 nM                    | 3488.57        | 230.02 | 0.0129 (*)   | 100 nM      | 3278.02        | 81.12  | <0.001 (***) |
| 1 $\mu$ M                 | 3260.78        | 160.78 | <0.001 (***) | 1 $\mu$ M   | 3099.11        | 121.38 | <0.001 (***) |
| 10 $\mu$ M                | 3349.04        | 120.10 | <0.001 (***) | 10 $\mu$ M  | 2827.09        | 447.99 | <0.001 (***) |
| 100 $\mu$ M               | 3347.23        | 86.89  | <0.001 (***) | 100 $\mu$ M | 2965.23        | 359.81 | <0.001 (***) |
| 1 mM                      | 3285.85        | 101.72 | <0.001 (***) | 1 mM        | 3039.15        | 155.88 | <0.001 (***) |
| Arecoline <i>N</i> -oxide | Mean( $\mu$ m) | SD     | P value      |             |                |        |              |
| Control                   | 3726.66        | 56.26  |              |             |                |        |              |
| 100 nM                    | 3715.03        | 111.30 | 0.9999 (ns)  |             |                |        |              |
| 1 $\mu$ M                 | 3554.11        | 331.75 | 0.5539 (ns)  |             |                |        |              |
| 10 $\mu$ M                | 3551.11        | 165.66 | 0.5378 (ns)  |             |                |        |              |
| 100 $\mu$ M               | 3241.90        | 65.03  | 0.0018 (**)  |             |                |        |              |
| 1 mM                      | 2948.71        | 518.58 | <0.001 (***) |             |                |        |              |

**Table S5.** Somatic axis bending of the zebrafish larvae after exposure to areca alkaloids at 96 hpf

| Arecoline                 | Mean(%) | SD   | P value       | Arecaidine  | Mean(%) | SD   | P value       |
|---------------------------|---------|------|---------------|-------------|---------|------|---------------|
| Control                   | 2.76    | 0.17 |               | Control     | 2.68    | 0.15 |               |
| 100 nM                    | 6.73    | 1.50 | > 0.05 (ns)   | 100 nM      | 12.72   | 6.42 | < 0.01 (**)   |
| 1 $\mu$ M                 | 13.16   | 0.35 | < 0.01 (**)   | 1 $\mu$ M   | 12.17   | 1.43 | < 0.01 (**)   |
| 10 $\mu$ M                | 20.53   | 1.42 | < 0.001 (***) | 10 $\mu$ M  | 14.78   | 1.42 | < 0.001 (***) |
| 100 $\mu$ M               | 45.64   | 3.30 | < 0.001 (***) | 100 $\mu$ M | 28.45   | 2.60 | < 0.001 (***) |
| 1 mM                      | 68.53   | 3.32 | < 0.001 (***) | 1 mM        | 37.71   | 0.82 | < 0.001 (***) |
| Arecoline <i>N</i> -oxide | Mean(%) | SD   | P value       |             |         |      |               |
| Control                   | 2.81    | 0.16 |               |             |         |      |               |
| 100 nM                    | 9.61    | 1.58 | > 0.05 (ns)   |             |         |      |               |
| 1 $\mu$ M                 | 13.47   | 1.78 | < 0.001 (***) |             |         |      |               |
| 10 $\mu$ M                | 27.42   | 4.36 | < 0.001 (***) |             |         |      |               |
| 100 $\mu$ M               | 54.61   | 2.91 | < 0.001 (***) |             |         |      |               |
| 1 mM                      | 63.15   | 6.16 | < 0.001 (***) |             |         |      |               |

**Table S6.** Pericardial edema of the zebrafish larvae after exposure to areca alkaloids at 96 hpf

| Arecoline                 | Mean(%) | SD   | P value       | Arecaidine  | Mean(%) | SD   | P value       |
|---------------------------|---------|------|---------------|-------------|---------|------|---------------|
| Control                   | 2.76    | 0.17 |               | Control     | 2.68    | 0.15 |               |
| 100 nM                    | 6.73    | 1.50 | > 0.05 (ns)   | 100 nM      | 15.49   | 6.18 | < 0.001 (***) |
| 1 $\mu$ M                 | 11.31   | 1.60 | < 0.01 (**)   | 1 $\mu$ M   | 16.81   | 1.41 | < 0.001 (***) |
| 10 $\mu$ M                | 17.85   | 1.44 | < 0.001 (***) | 10 $\mu$ M  | 24.60   | 2.13 | < 0.001 (***) |
| 100 $\mu$ M               | 42.08   | 1.53 | < 0.001 (***) | 100 $\mu$ M | 44.33   | 1.59 | < 0.001 (***) |
| 1 mM                      | 59.46   | 2.35 | < 0.001 (***) | 1 mM        | 50.93   | 3.36 | < 0.001 (***) |
| Arecoline <i>N</i> -oxide | Mean(%) | SD   | P value       |             |         |      |               |
| Control                   | 2.81    | 0.16 |               |             |         |      |               |
| 100 nM                    | 11.51   | 2.73 | < 0.01 (**)   |             |         |      |               |
| 1 $\mu$ M                 | 16.36   | 1.81 | < 0.001 (***) |             |         |      |               |
| 10 $\mu$ M                | 30.48   | 4.36 | < 0.001 (***) |             |         |      |               |
| 100 $\mu$ M               | 59.22   | 1.82 | < 0.001 (***) |             |         |      |               |
| 1 mM                      | 66.93   | 4.80 | < 0.001 (***) |             |         |      |               |

**Table S7.** Swim bladder loss of the zebrafish larvae after exposure to areca alkaloids at 96 hpf

| Arecoline         | Mean(%) | SD   | P value       | Arecaidine  | Mean(%) | SD   | P value       |
|-------------------|---------|------|---------------|-------------|---------|------|---------------|
| Control           | 2.76    | 0.17 |               | Control     | 2.68    | 0.15 |               |
| 100 nM            | 10.92   | 1.38 | < 0.05 (*)    | 100 nM      | 22.21   | 1.04 | < 0.001 (***) |
| 1 $\mu$ M         | 19.14   | 1.67 | < 0.001 (***) | 1 $\mu$ M   | 26.49   | 0.94 | < 0.001 (***) |
| 10 $\mu$ M        | 27.69   | 1.80 | < 0.001 (***) | 10 $\mu$ M  | 33.90   | 2.18 | < 0.001 (***) |
| 100 $\mu$ M       | 51.71   | 2.72 | < 0.001 (***) | 100 $\mu$ M | 59.25   | 7.26 | < 0.001 (***) |
| 1 mM              | 83.80   | 2.49 | < 0.001 (***) | 1 mM        | 81.64   | 4.09 | < 0.001 (***) |
| Arecoline N-oxide | Mean(%) | SD   | P value       |             |         |      |               |
| Control           | 2.81    | 0.16 |               |             |         |      |               |
| 100 nM            | 15.38   | 1.54 | < 0.001 (***) |             |         |      |               |
| 1 $\mu$ M         | 18.26   | 1.53 | < 0.001 (***) |             |         |      |               |
| 10 $\mu$ M        | 39.05   | 4.36 | < 0.001 (***) |             |         |      |               |
| 100 $\mu$ M       | 75.11   | 4.53 | < 0.001 (***) |             |         |      |               |
| 1 mM              | 85.85   | 2.87 | < 0.001 (***) |             |         |      |               |

**Table S8.** Fold change in ROS in zebrafish larvae after exposure to areca alkaloids at 96 hpf (N=3)

| Arecoline                    | Mean   | SD    | P value       | Arecaidine  | Mean  | SD    | P value       |
|------------------------------|--------|-------|---------------|-------------|-------|-------|---------------|
| Control                      | 1.000  | 0.057 |               | Control     | 1.000 | 0.074 |               |
| 1 $\mu$ M                    | 1.182  | 0.352 | >0.05 (ns)    | 1 $\mu$ M   | 1.177 | 0.187 | >0.05 (ns)    |
| 10 $\mu$ M                   | 2.096  | 0.591 | >0.05 (ns)    | 10 $\mu$ M  | 2.568 | 0.583 | < 0.01 (**)   |
| 100 $\mu$ M                  | 3.712  | 0.367 | < 0.001 (***) | 100 $\mu$ M | 5.798 | 0.561 | < 0.001 (***) |
| 1 mM                         | 5.162  | 0.299 | < 0.001 (***) | 1 mM        | 7.856 | 0.562 | < 0.001 (***) |
| Arecoline<br><i>N</i> -oxide | Mean   | SD    | P value       |             |       |       |               |
| Control                      | 1.000  | 0.053 |               |             |       |       |               |
| 1 $\mu$ M                    | 3.765  | 0.925 | < 0.001 (***) |             |       |       |               |
| 10 $\mu$ M                   | 7.634  | 0.501 | < 0.001 (***) |             |       |       |               |
| 100 $\mu$ M                  | 8.610  | 0.315 | < 0.001 (***) |             |       |       |               |
| 1 mM                         | 12.561 | 0.772 | < 0.001 (***) |             |       |       |               |

**Table S9.** MDA of the zebrafish larvae after exposure to areca alkaloids at 96 hpf (N=4)

| Arecoline                    | Mean(nmol/<br>mg weight) | SD    | P value       | Arecaidine  | Mean(nmol/<br>mg weight) | SD    | P value       |
|------------------------------|--------------------------|-------|---------------|-------------|--------------------------|-------|---------------|
| Control                      | 0.607                    | 0.069 |               | Control     | 0.582                    | 0.021 |               |
| 1 $\mu$ M                    | 0.672                    | 0.089 | >0.05 (ns)    | 1 $\mu$ M   | 0.633                    | 0.075 | >0.05 (ns)    |
| 10 $\mu$ M                   | 0.821                    | 0.053 | < 0.001 (***) | 10 $\mu$ M  | 0.774                    | 0.030 | < 0.001 (***) |
| 100 $\mu$ M                  | 1.025                    | 0.127 | < 0.001 (***) | 100 $\mu$ M | 0.752                    | 0.026 | < 0.001 (***) |
| 1 mM                         | 1.287                    | 0.053 | < 0.001 (***) | 1 mM        | 0.859                    | 0.042 | < 0.001 (***) |
| Arecoline<br><i>N</i> -oxide | Mean(nmol/<br>mg weight) | SD    | P value       |             |                          |       |               |
| Control                      | 0.598                    | 0.021 |               |             |                          |       |               |
| 1 $\mu$ M                    | 0.684                    | 0.015 | >0.05 (ns)    |             |                          |       |               |
| 10 $\mu$ M                   | 0.716                    | 0.042 | < 0.05 (*)    |             |                          |       |               |
| 100 $\mu$ M                  | 0.715                    | 0.023 | < 0.05 (*)    |             |                          |       |               |
| 1 mM                         | 0.740                    | 0.047 | < 0.01 (**)   |             |                          |       |               |



**Table S10.** LPO of the zebrafish larvae after exposure to areca alkaloids at 96 hpf (N=4)

| Arecoline                    | Mean(nmol/<br>mg weight) | SD    | P value       | Arecaidine  | Mean(nmol/<br>mg weight) | SD    | P value       |
|------------------------------|--------------------------|-------|---------------|-------------|--------------------------|-------|---------------|
| Control                      | 0.973                    | 0.061 |               | Control     | 0.825                    | 0.061 |               |
| 1 $\mu$ M                    | 1.441                    | 0.035 | < 0.001 (***) | 1 $\mu$ M   | 1.056                    | 0.067 | < 0.01 (**)   |
| 10 $\mu$ M                   | 2.036                    | 0.078 | < 0.001 (***) | 10 $\mu$ M  | 1.250                    | 0.189 | < 0.001 (***) |
| 100 $\mu$ M                  | 2.590                    | 0.152 | < 0.001 (***) | 100 $\mu$ M | 1.791                    | 0.082 | < 0.001 (***) |
| 1 mM                         | 3.016                    | 0.053 | < 0.001 (***) | 1 mM        | 2.372                    | 0.030 | < 0.001 (***) |
| Arecoline<br><i>N</i> -oxide | Mean(nmol/<br>mg weight) | SD    | P value       |             |                          |       |               |
| Control                      | 0.890                    | 0.061 |               |             |                          |       |               |
| 1 $\mu$ M                    | 1.010                    | 0.047 | >0.05 (ns)    |             |                          |       |               |
| 10 $\mu$ M                   | 1.506                    | 0.044 | < 0.001 (***) |             |                          |       |               |
| 100 $\mu$ M                  | 1.960                    | 0.056 | < 0.001 (***) |             |                          |       |               |
| 1 mM                         | 3.344                    | 0.052 | < 0.001 (***) |             |                          |       |               |

**Table S11.** Fold change in GSH in zebrafish larvae after exposure to areca alkaloids at 96 hpf (N=4)

| Arecoline                    | Mean  | SD    | P value       | Arecaidine  | Mean  | SD    | P value       |
|------------------------------|-------|-------|---------------|-------------|-------|-------|---------------|
| Control                      | 1.000 | 0.060 |               | Control     | 1.000 | 0.035 |               |
| 1 $\mu$ M                    | 0.898 | 0.035 | < 0.05 (*)    | 1 $\mu$ M   | 0.954 | 0.070 | >0.05 (ns)    |
| 10 $\mu$ M                   | 0.797 | 0.048 | < 0.001 (***) | 10 $\mu$ M  | 0.847 | 0.038 | < 0.001 (***) |
| 100 $\mu$ M                  | 0.570 | 0.025 | < 0.001 (***) | 100 $\mu$ M | 0.791 | 0.015 | < 0.001 (***) |
| 1 mM                         | 0.470 | 0.091 | < 0.001 (***) | 1 mM        | 0.737 | 0.032 | < 0.001 (***) |
| Arecoline<br><i>N</i> -oxide | Mean  | SD    | P value       |             |       |       |               |
| Control                      | 1.000 | 0.034 |               |             |       |       |               |
| 1 $\mu$ M                    | 0.991 | 0.031 | >0.05 (ns)    |             |       |       |               |
| 10 $\mu$ M                   | 0.739 | 0.050 | < 0.001 (***) |             |       |       |               |
| 100 $\mu$ M                  | 0.631 | 0.048 | < 0.001 (***) |             |       |       |               |
| 1 mM                         | 0.602 | 0.040 | < 0.001 (***) |             |       |       |               |

**Table S12.** Fold change in GSSG in zebrafish larvae after exposure to areca alkaloids at 96 hpf

(N=4)

| Arecoline                    | Mean  | SD    | P value       | Arecaidine  | Mean  | SD    | P value       |
|------------------------------|-------|-------|---------------|-------------|-------|-------|---------------|
| Control                      | 1.000 | 0.038 |               | Control     | 1.000 | 0.031 |               |
| 1 $\mu$ M                    | 0.945 | 0.041 | >0.05 (ns)    | 1 $\mu$ M   | 1.077 | 0.029 | >0.05 (ns)    |
| 10 $\mu$ M                   | 1.088 | 0.044 | < 0.05 (*)    | 10 $\mu$ M  | 1.062 | 0.031 | >0.05 (ns)    |
| 100 $\mu$ M                  | 1.085 | 0.051 | < 0.05 (*)    | 100 $\mu$ M | 1.076 | 0.031 | >0.05 (ns)    |
| 1 mM                         | 1.130 | 0.077 | < 0.001 (***) | 1 mM        | 1.556 | 0.032 | < 0.001 (***) |
| Arecoline<br><i>N</i> -oxide | Mean  | SD    | P value       |             |       |       |               |
| Control                      | 1.000 | 0.028 |               |             |       |       |               |
| 1 $\mu$ M                    | 1.081 | 0.029 | < 0.05 (*)    |             |       |       |               |
| 10 $\mu$ M                   | 0.946 | 0.009 | >0.05 (ns)    |             |       |       |               |
| 100 $\mu$ M                  | 1.027 | 0.033 | >0.05 (ns)    |             |       |       |               |
| 1 mM                         | 1.247 | 0.047 | < 0.001 (***) |             |       |       |               |

**Table S13.** GSH/GSSG of zebrafish larvae after exposure to areca alkaloids at 96 hpf (N=4)

| Arecoline                    | Mean  | SD    | P value       | Arecaidine  | Mean  | SD    | P value       |
|------------------------------|-------|-------|---------------|-------------|-------|-------|---------------|
| Control                      | 0.973 | 0.061 |               | Control     | 0.825 | 0.061 |               |
| 1 $\mu$ M                    | 1.441 | 0.035 | < 0.001 (***) | 1 $\mu$ M   | 1.056 | 0.067 | < 0.01 (**)   |
| 10 $\mu$ M                   | 2.036 | 0.078 | < 0.001 (***) | 10 $\mu$ M  | 1.250 | 0.189 | < 0.001 (***) |
| 100 $\mu$ M                  | 2.590 | 0.152 | < 0.001 (***) | 100 $\mu$ M | 1.791 | 0.082 | < 0.001 (***) |
| 1 mM                         | 3.016 | 0.026 | < 0.001 (***) | 1 mM        | 2.372 | 0.030 | < 0.001 (***) |
| Arecoline<br><i>N</i> -oxide | Mean  | SD    | P value       |             |       |       |               |
| Control                      | 0890  | 0.061 |               |             |       |       |               |
| 1 $\mu$ M                    | 1.010 | 0.047 | < 0.05 (*)    |             |       |       |               |
| 10 $\mu$ M                   | 1.506 | 0.044 | < 0.001 (***) |             |       |       |               |
| 100 $\mu$ M                  | 1.960 | 0.056 | < 0.001 (***) |             |       |       |               |
| 1 mM                         | 3.344 | 0.052 | < 0.001 (***) |             |       |       |               |

**Table S14.** Average movement distance per min of the zebrafish larvae in the light or dark after exposure to areca alkaloids at 96 hpf (N=15)

| Light                | Mean<br>(mm) | SD    | P value      | Dark                 | Mean<br>(mm) | SD    | P value      |
|----------------------|--------------|-------|--------------|----------------------|--------------|-------|--------------|
| Control              | 88.81        | 66.69 |              | Control              | 167.2        | 46.92 |              |
| Arecoline            | 43.25        | 11.43 | <0.001 (***) | Arecoline            | 66.83        | 17.76 | <0.001 (***) |
| Arecaidine           | 63.21        | 14.11 | <0.01 (**)   | Arecaidine           | 130.8        | 16.99 | <0.001 (***) |
| Arecoline<br>N-oxide | 52.31        | 11.66 | <0.001 (***) | Arecoline<br>N-oxide | 63.25        | 17.67 | <0.001 (***) |

**Table S15.** Total movement distance of the zebrafish larvae after exposure to areca alkaloids at 96

hpf (N=15)

| Group             | Mean(mm) | SD    | P value      |
|-------------------|----------|-------|--------------|
| Control           | 7679     | 795.2 |              |
| Arecoline         | 3302     | 291.1 | <0.001 (***) |
| Arecaidine        | 5821     | 599.8 | <0.001 (***) |
| Arecoline N-oxide | 3457     | 412.6 | <0.001 (***) |

**Table S16.** Mean speed of the zebrafish larvae after exposure to areca alkaloids at 96 hpf (N=15)

| Group             | Mean(mm/min) | SD    | P value      |
|-------------------|--------------|-------|--------------|
| Control           | 128.0        | 13.25 |              |
| Arecoline         | 55.04        | 4.85  | <0.001 (***) |
| Arecaidine        | 97.01        | 9.99  | <0.001 (***) |
| Arecoline N-oxide | 57.62        | 6.88  | <0.001 (***) |

**Table S17.** Primers of the selected genes for quantitative real–time PCR.

| Gene name         | Forward primer (5'–3') | Reverse primer (5'–3') |
|-------------------|------------------------|------------------------|
| <i>atf4</i>       | TGGATCTGGACTCTCTCCCG   | ACTGGAACCTCAGTGTGCTC   |
| <i>atf6</i>       | GAGCCTCAGTCACCGTACTC   | GCACACCTGGATGGGTCTTT   |
| <i>elf2s1a</i>    | ACCGCTTGGGTGTTTGATGA   | CACCTCAATGTCTGCTCGGA   |
| <i>hspa5</i>      | ATGAAGACGTTTGCACCGGA   | CTTTAGTGGCCTGACGCTGA   |
| <i>chop</i>       | CACAGACCCTGAATCAGAAG   | CCACGTGTCTTTTATCTCCC   |
| <i>tp53</i>       | TGGAGATAACTTGGCGCCTG   | ACCAAGCTGTGGTGCTTCAT   |
| <i>sqstm1</i>     | CCCTCCTGGTCCCTGTCATA   | CAGGTGGGGCACAAGTCATA   |
| <i>bax</i>        | TGTATGAGCGTGTTTCGTCGG  | AGACGTCTTGAGTCGGCTG    |
| <i>bcl2</i>       | GCGGAGGGAACAACCTCTGAA  | CTCTTCGGCCACGGTTAGAA   |
| <i>caspase –3</i> | GATCGCAGGACAGGCATGAA   | CGTCATGGGCAACTGTTGTT   |
| <i>actb</i>       | CTCTGGTGATGGTGTGACCC   | ATTCTCTTTTCGGCCGTGGT   |
